# Supplementary material for: An examination of social relations and concussion management via the blue card
Source: Frontiers journal article supplement (doi:10.3389/fspor.2024.1392809), 2024-06-03
Supplement: Data_Sheet_1.PDF [file Data_Sheet_1.PDF]

## **Interview Questions**

### **1. Introduction**

Background:

Rugby is one of the most popular contact sport world-wide. Due to the substantial physical demands of the sport, there is a substantial risk of injury for those who participate. Managing these risks is a complicated process involving many stakeholders within the sport community.

Purpose:

The purpose of this research is to better understand the experiences of Match Officials regarding the management of injury risk in rugby, and more specifically the Blue Card process.

Outline:

This interview will cover questions relating to sport-related concussion injury, managing injury risk in rugby, the role and experience of Match Officials, and the Blue Card process. Each topic will include several questions and prompts.

### **2. Match Official: Orientation and rapport building**

- ☐ To start, I would like to talk a little bit about your experience as a rugby Match Official and your interest in this study.
- ☐ So, what interested you in participating in this study?
- ☐ If you are comfortable, could you share an experience in that role as a match official that stands out to you?

### **3. Match Official Role: SRC management & the Blue Card**

- ☐ What expectations are placed on referees in regards to managing injury risk? SRC?
- ☐ What signs would suggest a player should be issued a Blue Card and removed from play?
- ☐ Prompt: Envision yourself in a situation where you have to give an athlete a Blue Card.
- ☐ Outline your thought process when considering whether to issue a Blue Card or not.
- ☐ How do you anticipate the process going?
- ☐ Describe your level of comfort issuing a Blue Card.
- ☐ What other considerations might you have when deciding whether to issue a Blue Card?

- ☐ Now I would like to talk about the Blue Card. With these questions, I am hoping to better understand your thoughts and experiences on the process.
- ☐ Could you explain to me what the Blue Card process is
- ☐ Could you tell me about your experience with the Blue Card process?
- ☐ How do you view the Blue Card process in relation to the management of injury risk?
- ☐ What training was provided for you on the Blue Card process?
- ☐ Is there any additional training that you think would benefit Match Officials?
- ☐ Have you done any reading or personal research regarding the Blue Card process?

#### **4. Actions of Others: Response to the Blue Card & SRC management**

- ☐ How have athletes and other sport community members reacted when an athlete is removed from play due to a suspected concussion?
- ☐ Do you think athletes / others will follow to the Blue Card process?
- ☐ How might a referee deal with an athlete / other who react(s) negatively to the Blue Card / SRC management?
- ☐ What concerns do you have over the implementation of the Blue Card process?
- ☐ What impact do you think the Blue Card will have on rugby / SRC management?
- ☐ Do you have any experiences that you feel are unique to you as a female/male/non-binary Match Official?
- ☐ Compared to your female/male counterparts, how would you describe your experience managing injury risk in rugby?
- ☐ What factors contribute to your experiences?

#### **5. Responsibilities: Managing risk / safety of participants**

- ☐ As a Match Official, how do you view your responsibility in managing injury risk?
- ☐ How do you, as a Match Official, strike a balance between keeping players safe while ensuring you are not influencing the outcome of the game?
- ☐ How effective do you think referees can be in identifying high risk situations in games?

- ☐ Who do you think is most responsible for ensuring the safety of the game?
- ☐ How do you feel is responsibility shared among members of the rugby community?
- ☐ At what point is the match official no longer responsible for the safety of the players?
- ☐ What is the most important part of concussion management?

## **6. Concussion Knowledge**

- ☐ I have a few questions regarding concussion injuries. With these questions, I am hoping to better understand your thoughts and experiences on them.
- ☐ Please describe your understanding of sport-related concussion injury.
- ☐ How do concussion injuries compare to other sport-related injuries?
- ☐ What are your thoughts on how concussion injuries are managed in rugby?
